# Supplementary material
Source: PubMed Central journal article supplement (PMC5578445)
Supplement: NIHMS886357-supplement-Supplemental_Digital_Content.pdf [file NIHMS886357-supplement-Supplemental_Digital_Content.pdf]

## Appendix 1.

In addition to the authors, other members of the *Eunice Kennedy Shriver* National Institute of Child Health and Human Development Maternal-Fetal Medicine Units Network are as follows:

*The University of Texas Health Science Center at Houston, McGovern Medical School-Children's Memorial Hermann Hospital, Houston, TX*– S. Blackwell, F. Ortiz, P. Givens, B. Rech, C. Moran, M. Hutchinson, Z. Spears, C. Carreno, B. Heaps, G. Zamora

*Columbia University, New York, NY* – M. Talucci, M. Zylfijaj, Z. Reid (Drexel U.), R. Leed (Drexel U.), J. Benson (Christiana H.), S. Forester (Christiana H.), C. Kitto (Christiana H.), S. Davis (St. Peter's UH.), M. Falk (St. Peter's UH.), C. Perez (St. Peter's UH)

*University of Utah Health Sciences Center, Salt Lake City, UT* – K. Hill, A. Sowles, J. Postma (LDS Hospital), S. Alexander (LDS Hospital), G. Andersen (LDS Hospital), V. Scott (McKay-Dee), V. Morby (McKay-Dee), K. Jolley (UVRMC), J. Miller (UVRMC), B. Berg (UVRMC)

*University of North Carolina at Chapel Hill, Chapel Hill, NC* – K. Dorman, J. Mitchell, E. Kaluta, K. Clark (WakeMed), K. Spicer (WakeMed), S. Timlin (Rex), K. Wilson (Rex)

*University of Texas Southwestern Medical Center, Dallas, TX* – L. Moseley, M. Santillan, J. Price, K. Buentipo, V. Bludau, T. Thomas, L. Fay, C. Melton, J. Kingsbery, R. Benezue

*University of Pittsburgh, Pittsburgh, PA* – H. Simhan, M. Bickus, D. Fischer, T. Kamon (deceased), D. DeAngelis

*MetroHealth Medical Center-Case Western Reserve University, Cleveland, OH* – B. Mercer, C. Milluzzi, W. Dalton, T. Dotson, P. McDonald, C. Brezine, A. McGrail

*The Ohio State University, Columbus, OH* – C. Latimer, L. Guzzo (St. Ann's), F. Johnson, L. Gerwig (St. Ann's), S. Fyffe, D. Loux (St. Ann's), S. Frantz, D. Cline, S. Wylie, J. Iams

*University of Alabama at Birmingham, Birmingham, AL* – M. Wallace, A. Northen, J. Grant, C. Colquitt, D. Rouse, W. Andrews

*Northwestern University, Chicago, IL* – G. Mallett, M. Ramos-Brinson, A. Roy, L. Stein, P. Campbell, C. Collins, N. Jackson, M. Dinsmoor (NorthShore University HealthSystem), J. Senka (NorthShore University HealthSystem), K. Paychek (NorthShore University HealthSystem), A. Peaceman

*University of Texas Medical Branch, Galveston, TX* – J. Moss, A. Salazar, A. Acosta, G. Hankins

*Wayne State University, Detroit, MI* – N. Hauff, L. Palmer, P. Lockhart, D. Driscoll, L. Wynn, C. Sudz, D. Dengate, C. Girard, S. Field

Chauhan SP, Rice MM, Grobman WA, Bailit J, Reddy UM, Wapner RJ, et al. Neonatal morbidity of small- and large-for-gestational-age infants born at term in uncomplicated pregnancies. *Obstet Gynecol* 2017; 130.

The authors provided this information as a supplement to their article.

©2017 American College of Obstetricians and Gynecologists.

*Brown University, Providence, RI* – P. Breault, F. Smith, N. Annunziata, D. Allard, J. Silva, M. Gamage, J. Hunt, J. Tillinghast, N. Corcoran, M. Jimenez

*Oregon Health & Science University, Portland, OR* – J. Seguin, M. Rincon, J. Snyder, C. Farrar, E. Lairson, C. Bonino, W. Smith (Kaiser Permanente), K. Beach (Kaiser Permanente), S. Van Dyke (Kaiser Permanente), S. Butcher (Kaiser Permanente)

*The George Washington University Biostatistics Center, Washington, D.C.* – E. Thom, Y. Zhao, P. McGee, V. Momirova, R. Palugod, B. Reamer, M. Larsen, C. Swartz, V. Bhandaru

*Eunice Kennedy Shriver National Institute of Child Health and Human Development, Bethesda, MD* – C. Spong, S. Tolivaisa

MFMU Network Steering Committee Chair (*Medical University of South Carolina, Charleston, SC*) – J. P. VanDorsten, M.D.

Chauhan SP, Rice MM, Grobman WA, Bailit J, Reddy UM, Wapner RJ, et al. Neonatal morbidity of small- and large-for-gestational-age infants born at term in uncomplicated pregnancies. *Obstet Gynecol* 2017; 130.

The authors provided this information as a supplement to their article.

©2017 American College of Obstetricians and Gynecologists.
